# Supplementary material for: Enhancing sensitivity in miniature mass spectrometry analysis via dicationic ionic liquid-based matrix-assisted ionization and charge inversion reactions
Source: Royal Society of Chemistry journal article supplement (doi:10.1039/d3gc03773h), 2023-12-13
Supplement: d3gc03773h1.pdf [file d3gc03773h1.pdf]

## Supporting Information

# Enhancing Sensitivity in Miniature Mass Spectrometry Analysis via Dicationic Ionic Liquid-Based Matrix-Assisted Ionization and Charge Inversion Reactions

Xiangyu Guo<sup>a</sup>, Yuncheng Ge<sup>a,b</sup>, Hua Bai<sup>a</sup>, Qiang Ma<sup>a,\*</sup>

<sup>a</sup> *Key Laboratory of Consumer Product Quality Safety Inspection and Risk Assessment for State Market Regulation, Chinese Academy of Inspection and Quarantine, Beijing 100176, China*

<sup>b</sup> *School of Life and Pharmaceutical Sciences, Dalian University of Technology, Panjin, 124221, China*

\* Corresponding Author:

Qiang Ma

Key Laboratory of Consumer Product Quality Safety Inspection and Risk Assessment for State  
Market Regulation, Chinese Academy of Inspection and Quarantine

Beijing 100176, China

E-mail: maqiang@caiq.org.cn

Phone: +86 10 53897463

Fax: +86 10 53897454

## Table of Contents

### Supplementary Scheme

Scheme S1: Complexation of the imidazolium-based dicationic ionic liquid (DIL) with deprotonated per- and polyfluoroalkyl substances (PFAS).

### Supplementary Tables

Table S1: Chemical information of four investigated PFAS.

Table S2: Chemical information of eight investigated DIL.

Table S3: Instrument parameters for the analysis of four PFAS using a miniature mass spectrometer.

Table S4: Comparison of the developed method with other approaches reported in the literature for the analysis of PFAS in water samples.

Table S5: The F-test and T-test results along with their corresponding p-values for assessing the consistency of results between our method and traditional UHPLC-MS/MS method.

Table S6: Greenness assessment of the developed method using three well-established metric tools (GAPI, AGREE, and BAGI).

Table S7: Comparison of greenness assessment results of the developed method and other traditional analytical methods using three well-established metric tools (GAPI, AGREE, and BAGI).

### Supplementary Figures

Figure S1: Photo of the wax-printing sample microspot array after pattern fixation.

Figure S2: Photo of the Disperse Blue 1 solution confined by the waxed surrounding area.

Figure S3: Optimization of the concentration of  $C_4(MIM)_2F_2$ .

Figure S4: Optimization of four matrix-assisted ionization (MAI) matrices.

Figure S5: Optimization of the concentration of 3-nitrobenzotrile (3-NBN).

Figure S6: MS spectra of PFOS (a), PFOA (b), PFNA (c), and PFDA (d) in negative ion mode without DILs.

Figure S7: Calibration curves of four investigated PFAS.

Figure S8: Geographical map of the sampling sites.

### References

## Supplementary Scheme

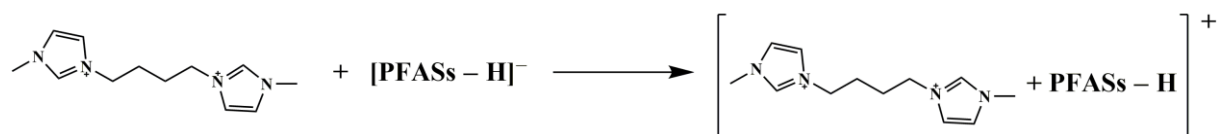

Scheme S1. Complexation of the imidazolium-based dicationic ionic liquid (DIL) with deprotonated per- and polyfluoroalkyl substances (PFAS).

## Supplementary Tables

Table S1. Chemical information of four investigated PFAS.

| PFAS                         | Abbreviation | Formula                                          | CAS       | MW     | LogKow |
|------------------------------|--------------|--------------------------------------------------|-----------|--------|--------|
| Perfluorooctanesulfonic acid | PFOS         | C <sub>8</sub> HF <sub>17</sub> O <sub>3</sub> S | 1763-23-1 | 500.13 | 4.49   |
| Perfluorooctanoic acid       | PFOA         | C <sub>8</sub> HF <sub>15</sub> O <sub>2</sub>   | 335-67-1  | 414.07 | 4.81   |
| Perfluorononanoic acid       | PFNA         | C <sub>9</sub> HF <sub>17</sub> O <sub>2</sub>   | 375-95-1  | 464.08 | 5.48   |
| Perfluorodecanoic acid       | PFDA         | C <sub>10</sub> HF <sub>19</sub> O <sub>2</sub>  | 335-76-2  | 514.08 | 6.15   |

Table S2. Chemical information of eight investigated DIL.

| No. | DIL                                        | Structure                                                                           | Formula               | MW     |
|-----|--------------------------------------------|-------------------------------------------------------------------------------------|-----------------------|--------|
| 1   | 1,1'-Diheptyl-4,4'-bipyridinium dibromide  | 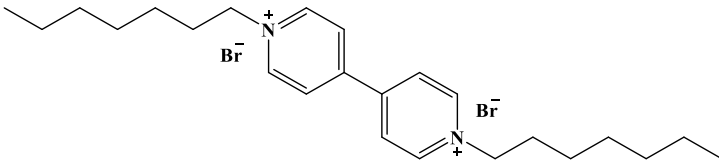  | $C_{24}H_{38}Br_2N_2$ | 512.14 |
| 2   | 1,1'-Diphenyl-4,4'-bipyridinium dichloride |   | $C_{22}H_{18}Cl_2N_2$ | 380.08 |
| 3   | 1,1'-Dibenzyl-4,4'-bipyridinium dichloride |   | $C_{24}H_{22}Cl_2N_2$ | 408.12 |
| 4   | 1,1'-Dioctyl-4,4'-bipyridinium dibromide   |  | $C_{26}H_{42}Br_2N_2$ | 540.17 |

|   |                                                                         |                                                                                     |                                                                       |
|---|-------------------------------------------------------------------------|-------------------------------------------------------------------------------------|-----------------------------------------------------------------------|
| 5 | 1,1'-(Butane-1,4-diyl)bis[4-aza-1-azoniabicyclo[2.2.2]octane] dibromide | 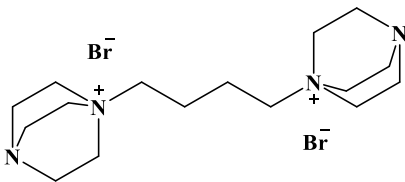  | C <sub>16</sub> H <sub>32</sub> Br <sub>2</sub> N <sub>4</sub> 438.09 |
| 6 | 1,1'-(2,6-Pyridinediyl)bis(3-methylimidazolium) dibromide               |   | C <sub>13</sub> H <sub>15</sub> Br <sub>2</sub> N <sub>5</sub> 398.97 |
| 7 | 1,1'-[1,4-Phenylenebis(methylene)]bis(4,4'-bipyridinium) dibromide      |   | C <sub>28</sub> H <sub>24</sub> Br <sub>2</sub> N <sub>4</sub> 574.04 |
| 8 | 1,1-Bis(3-methylimidazolium-1-yl) butylene dibromide                    |  | C <sub>10</sub> H <sub>20</sub> Br <sub>2</sub> N <sub>4</sub> 380.12 |

---

Table S3. Instrument parameters for the analysis of four PFAS using a miniature mass spectrometer.

| PFAS | Injection size (ms) | CID amplitude (V) | AC Precursor ion ( $m/z$ ) | Product ion 1 ( $m/z$ ) | Product ion 2 ( $m/z$ ) |
|------|---------------------|-------------------|----------------------------|-------------------------|-------------------------|
| PFOS | 39                  | 1.56              | 719.1                      | 636.8                   | 219.1                   |
| PFOA | 39                  | 1.75              | 633.1                      | 219.1                   | 138.1                   |
| PFNA | 41                  | 1.98              | 683.1                      | 219.1                   |                         |
| PFDA | 40                  | 2.23              | 733.1                      | 219.1                   |                         |

Table S4. Comparison of the developed method with other approaches reported in the literature for the analysis of PFAS in water samples.

| No. | Sample                                                  | Analyte | Method          | LOD              | LOQ              | Recovery/%   | RSD/%    | Time     | Reference |
|-----|---------------------------------------------------------|---------|-----------------|------------------|------------------|--------------|----------|----------|-----------|
| 1   | Environmental water, tap water, and swimming pool water | 4 PFAS  | MAI-Mini MS     | 5 µg/L           | 10 µg/L          | 86.6–106.3   | 3.5–7.2  | < 1 min  | This work |
| 2   | Lake water                                              | 11 PFAS | SPE-UHPLC-MS/MS | 0.03–1.9 ng/L    | 0.09–5.8 ng/L    | 97.3–113.0   | 1.0–9.0  | > 5 min  | 1         |
| 3   | Superficial and underground water                       | 12 PFAS | SPE-HPLC-MS/MS  | /                | 0.2–5 ng/L       | 81.0–107.2   | 8.3–13.8 | > 10 min | 2         |
| 4   | Estuarine water                                         | 23 PFAS | SPE-UHPLC-MS/MS | 0.48–1.68 pg/5µL | 1.71–5.40 pg/5µL | 78.54–112.61 | /        | > 8 min  | 3         |
| 5   | Tap water, river water, and waste water                 | 4 PFAS  | SPE-UHPLC-MS/MS | 0.04–0.05 ng/L   | 0.15–0.20 ng/L   | 94.5–101.5   | 1.1–8.3  | > 30 min | 4         |
| 6   | Reservoir water                                         | 12 PFAS | UHPLC-MS/MS     | 0.02–0.48ng/L    | 0.08–1.58ng/L    | 51.1–122.3   | 0.1–17.5 | > 30 min | 5         |
| 7   | Textiles and food packaging materials                   | 10 PFAS | UHPSFC-MS/MS    | 0.2–1.6 µg/kg    | 0.6–3.2 µg/kg    | 71.3–110.7   | 0.9–8.6  | > 30 min | 6         |



Table S5. The F-test and T-test results along with their corresponding p-values for assessing the consistency of results between the developed method and traditional UHPLC-MS/MS method.

| Method      | Detected concentration<br>( $\mu\text{g/L}$ , $n=3$ ) | F-test result       | Two-tailed T-test result |
|-------------|-------------------------------------------------------|---------------------|--------------------------|
| This work   | 13.0, 14.2, 13.8                                      | $P = 0.9372 > 0.05$ | $P = 0.1557 > 0.05$      |
| UHPLC-MS/MS | 12.1, 12.8, 13.4                                      | insignificant       | insignificant            |

Table S6. Greenness assessment of the developed method using three well-established metric tools (GAPI, AGREE, and BAGI).

| GAPI                                                                                                                                                                                                                                                                                                                                                                                                                                                                                                                                                                                                                                                                                                                                                                                                                 | AGREE                                                                                                                                                                                                                                                                                                                                                                            | BAGI                                                                                                                                                                                                                                                                                                                                                                                                                                                                 |
|----------------------------------------------------------------------------------------------------------------------------------------------------------------------------------------------------------------------------------------------------------------------------------------------------------------------------------------------------------------------------------------------------------------------------------------------------------------------------------------------------------------------------------------------------------------------------------------------------------------------------------------------------------------------------------------------------------------------------------------------------------------------------------------------------------------------|----------------------------------------------------------------------------------------------------------------------------------------------------------------------------------------------------------------------------------------------------------------------------------------------------------------------------------------------------------------------------------|----------------------------------------------------------------------------------------------------------------------------------------------------------------------------------------------------------------------------------------------------------------------------------------------------------------------------------------------------------------------------------------------------------------------------------------------------------------------|
| 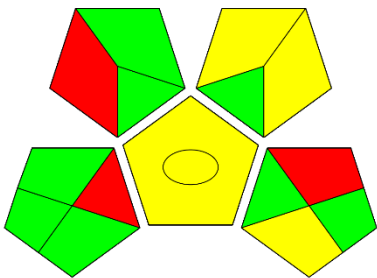                                                                                                                                                                                                                                                                                                                                                                                                                                                                                                                                                                                                                                                                                                                                    |                                                                                                                                                                                                                                                                                                 |                                                                                                                                                                                                                                                                                                                                                                                   |
| <p>First pentagram</p> <p>P1: Sample collection: Off-line</p> <p>P2: Sample preservation: None</p> <p>P3: Sample transport: None</p> <p>P4: Sample storage: None</p> <p>Second pentagram</p> <p>P5: Type of method: Simple procedures</p> <p>Third pentagram</p> <p>P6: Scale of extraction: Nano-extraction</p> <p>P7: Solvents/reagents used: No-green solvents/reagents used</p> <p>P8: additional treatments: None</p> <p>Fourth pentagram</p> <p>P9: Amount of reagents or solvents: &lt; 10 mL</p> <p>P10: Health Hazard: Moderately toxic</p> <p>P11 Safety hazard: Flammability score 2</p> <p>Fifth pentagram</p> <p>P12: Energy per sample: &lt; = 0.1 kWh</p> <p>P13: Occupational hazard: Emission of vapors to the atmosphere</p> <p>P14: Waste: &lt; 1 mL</p> <p>P15: Waste treatment: Degradation</p> | <p>P1: At-line</p> <p>P2: 0.001 mL</p> <p>P3: At-line</p> <p>P4: 3 or fewer</p> <p>P5: Manual and none or miniaturized</p> <p>P6: No derivatization</p> <p>P7: 0.001 mL</p> <p>P8: 4 analytes in single run, 60 sample per hour</p> <p>P9: 0.1kWh</p> <p>P10: None of the reagents are bio-based</p> <p>P11: 0.001 mL</p> <p>P12: Toxic to aquatic life and highly flammable</p> | <p>P1: Quantitative and Confirmatory</p> <p>P2: Multi-element analysis for 2–5 compounds of the same chemical class</p> <p>P3: Simple in operation portable instrumentation</p> <p>P4: 2–12</p> <p>P5: Simple sample preparation required</p> <p>P6: &gt; 10</p> <p>P7: Commercially available reagents that are noncommon in QC labs</p> <p>P8: No preconcentration is required</p> <p>P9: Manual treatment and analysis</p> <p>P10: &lt; = 10 mL environmental</p> |

Table S7. Comparison of greenness assessment results of the developed method and other traditional analytical methods using three well-established metric tools (GAPI, AGREE, and BAGI).

| Method          | GAPI                                                                                | AGREE                                                                               | BAGI                                                                                  | Reference |
|-----------------|-------------------------------------------------------------------------------------|-------------------------------------------------------------------------------------|---------------------------------------------------------------------------------------|-----------|
| MAI-Mini MS     | 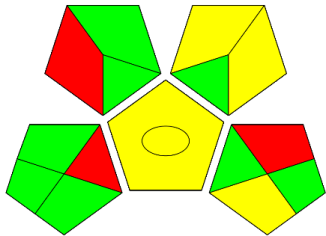   |    |    | This work |
| SPE-UHPLC-MS/MS |   |   |   | 1         |
| SPE-HPLC-MS/MS  |  |  |  | 2         |
| SPE-UHPLC-MS/MS |  |  |  | 3         |

SPE-UHPLC-  
MS/MS

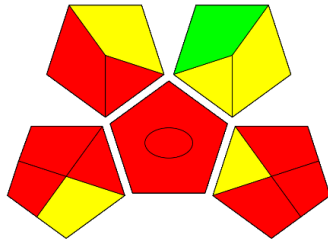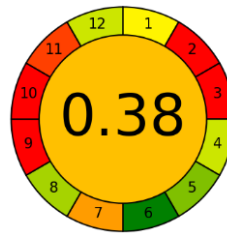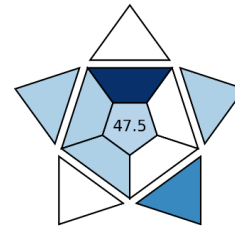

4

UHPLC-MS/  
MS

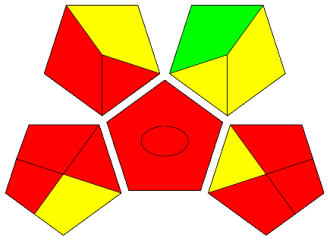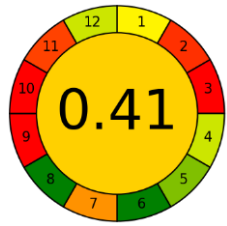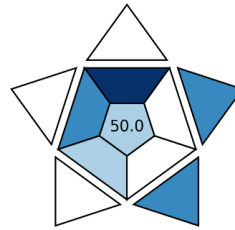

5

UHPSFC-M  
S/MS

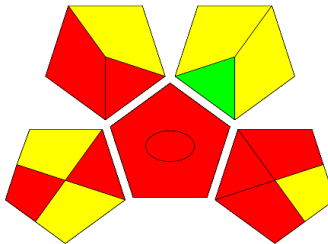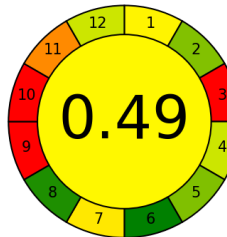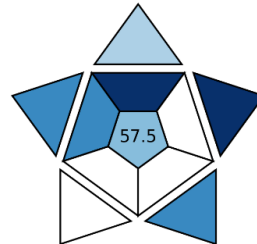

6

## Supplementary Figures

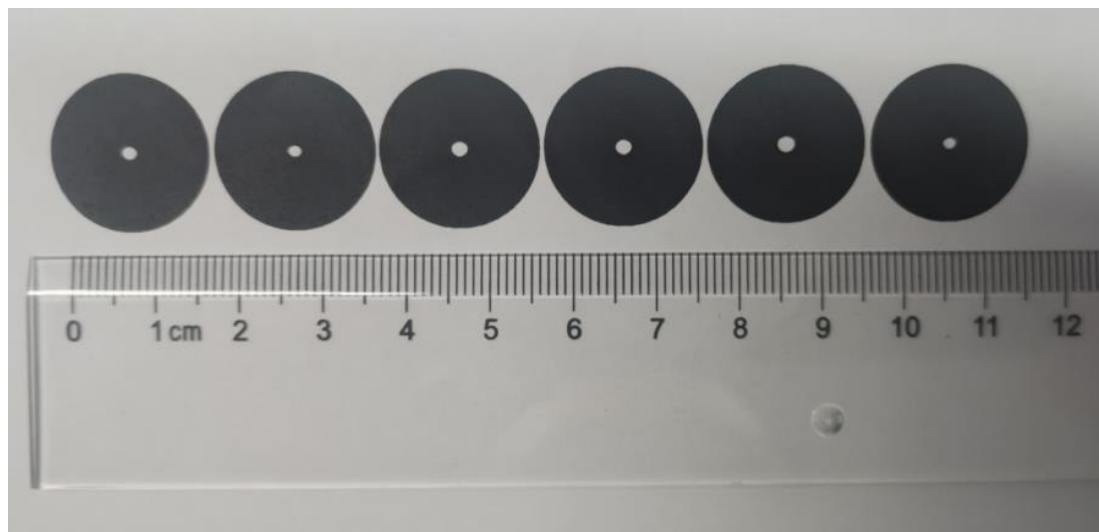

Figure S1. Photo of the wax-printing sample microspot array after pattern fixation.

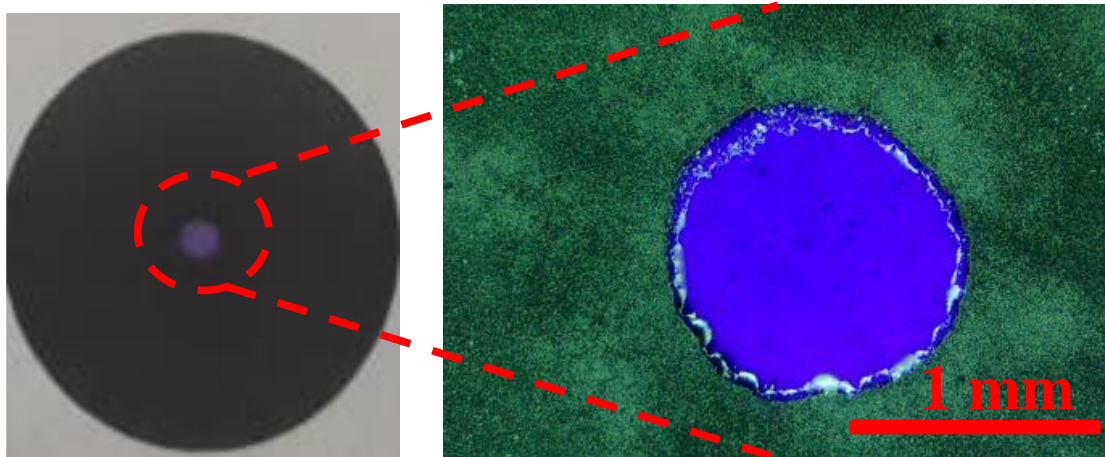

Figure S2. Photo of the Disperse Blue 1 solution confined by the waxed surrounding area.

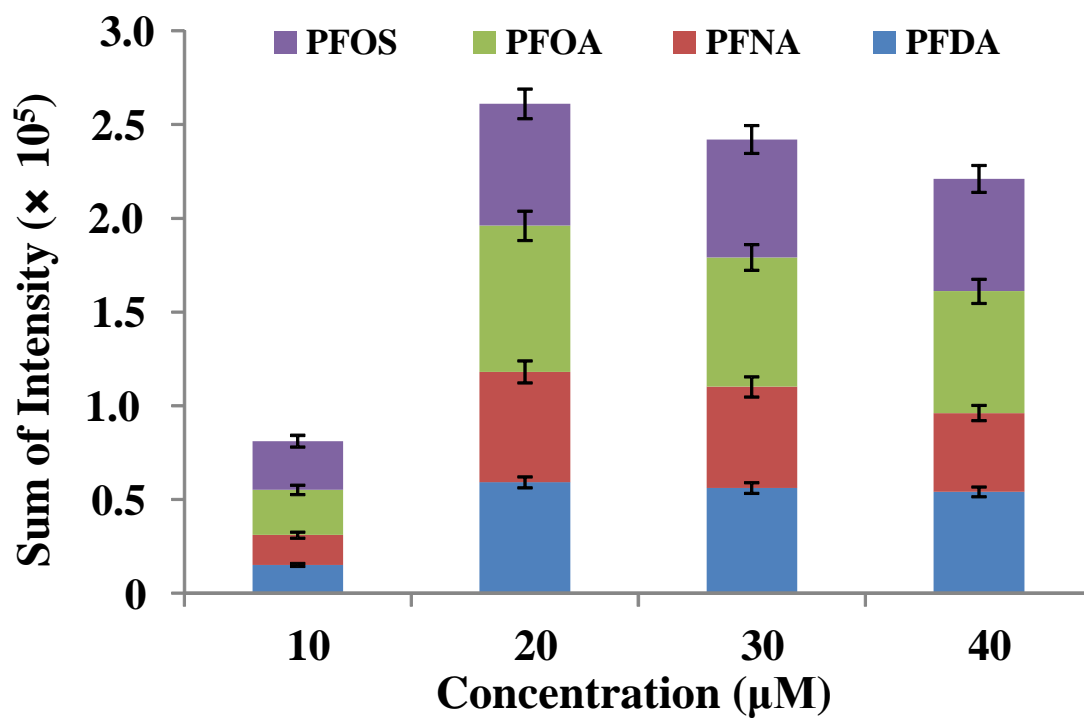

Figure S3. Optimization of the concentration of C<sub>4</sub>(MIM)<sub>2</sub>F<sub>2</sub>.

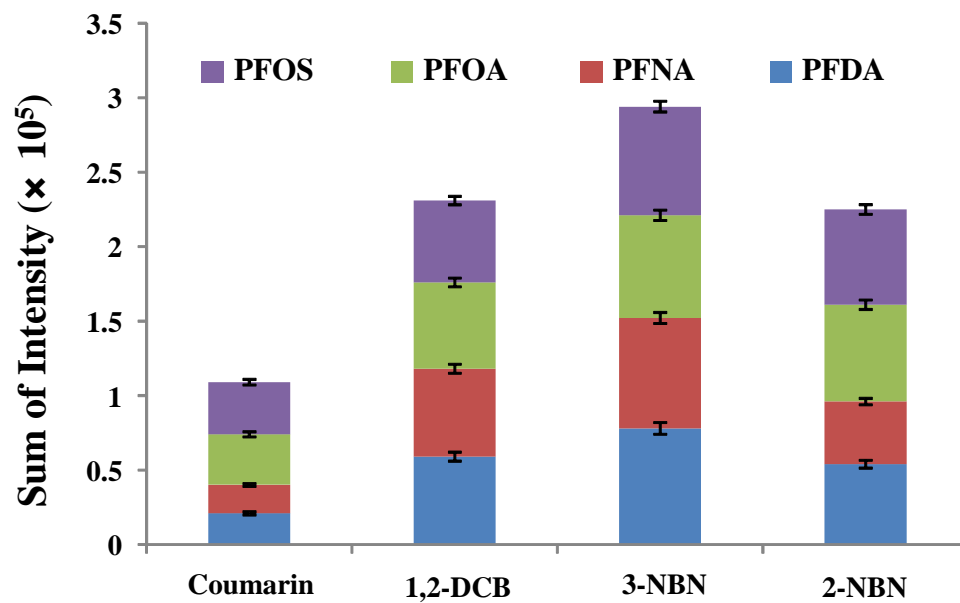

Figure S4. Optimization of four matrix-assisted ionization (MAI) matrices.



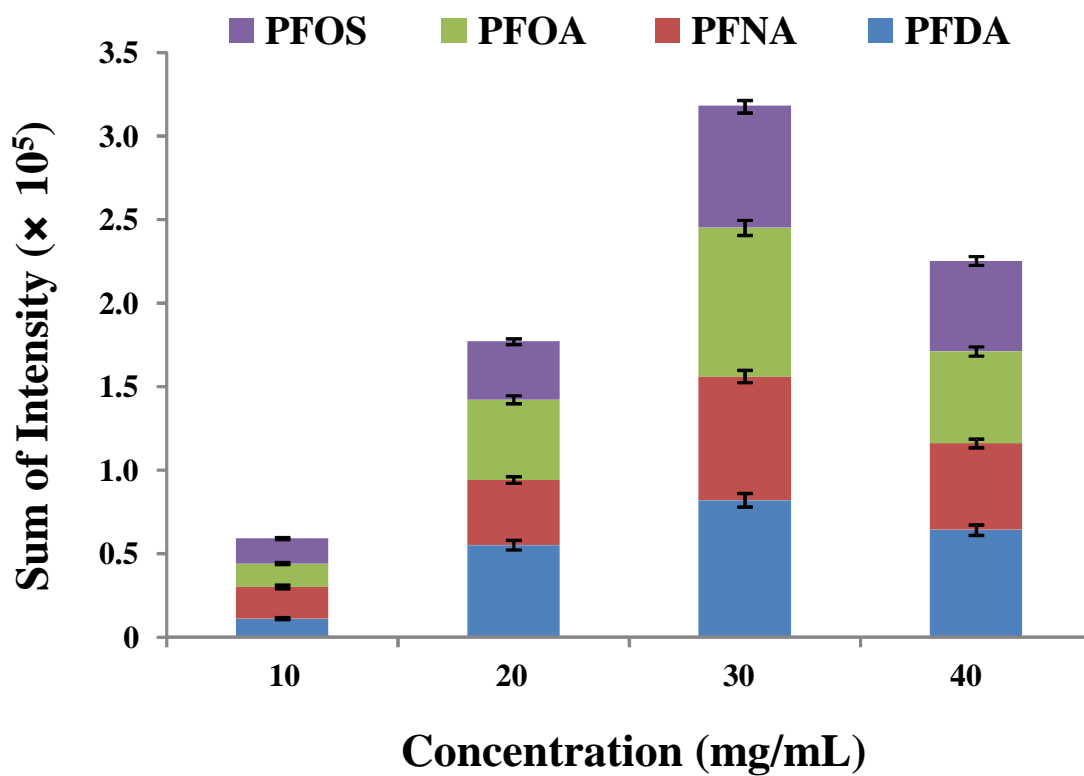

Figure S5. Optimization of the concentration of 3-nitrobenzotrile (3-NBN).

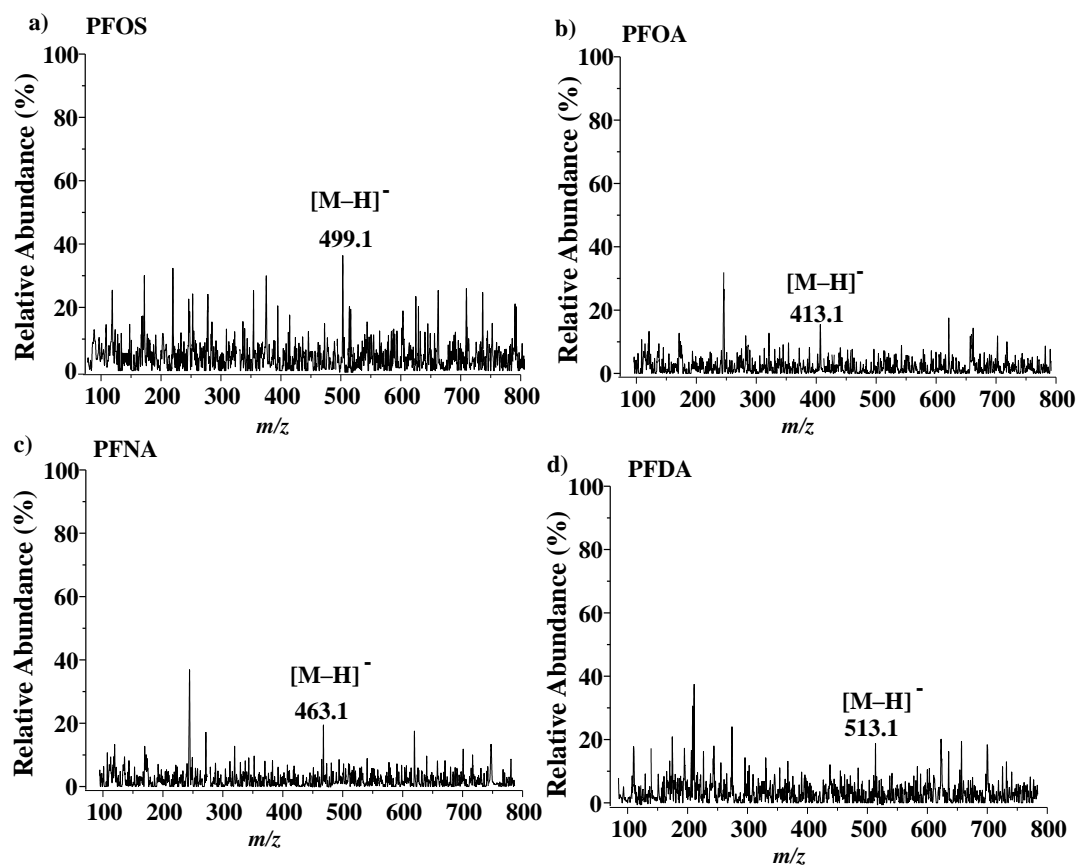

Figure S6. MS spectra of PFOS (a), PFOA (b), PFNA (c), and PFDA (d) in negative mode without DILs.

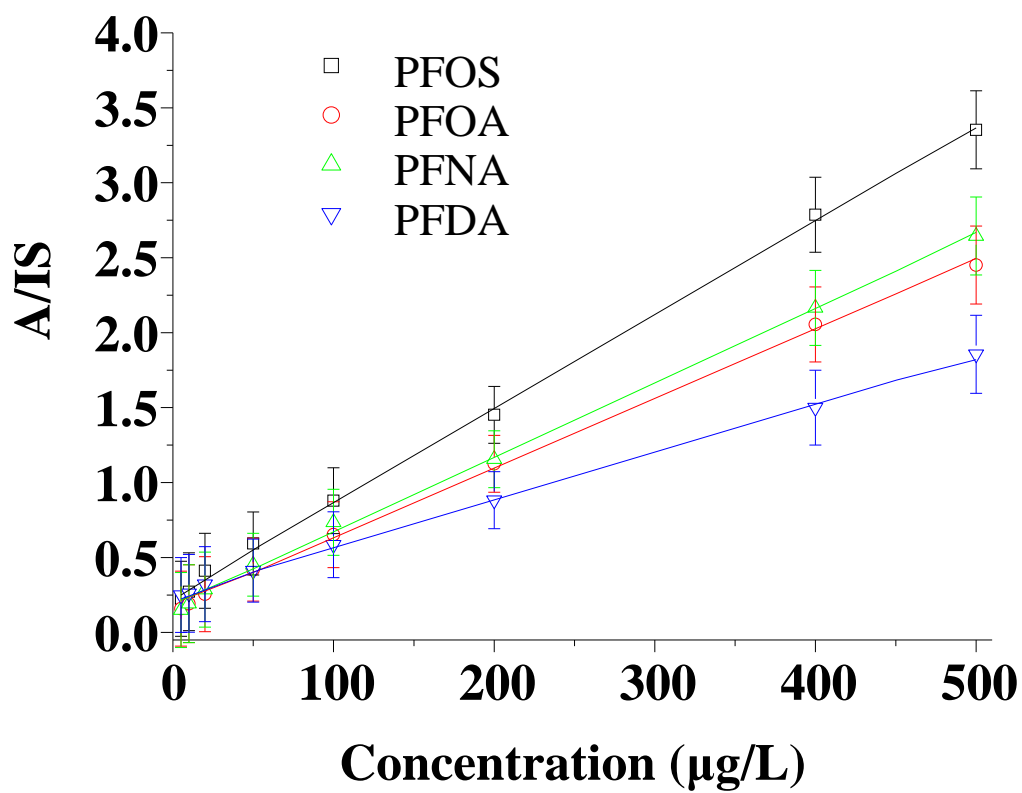

Figure S7. Calibration curves of four investigated PFAS.

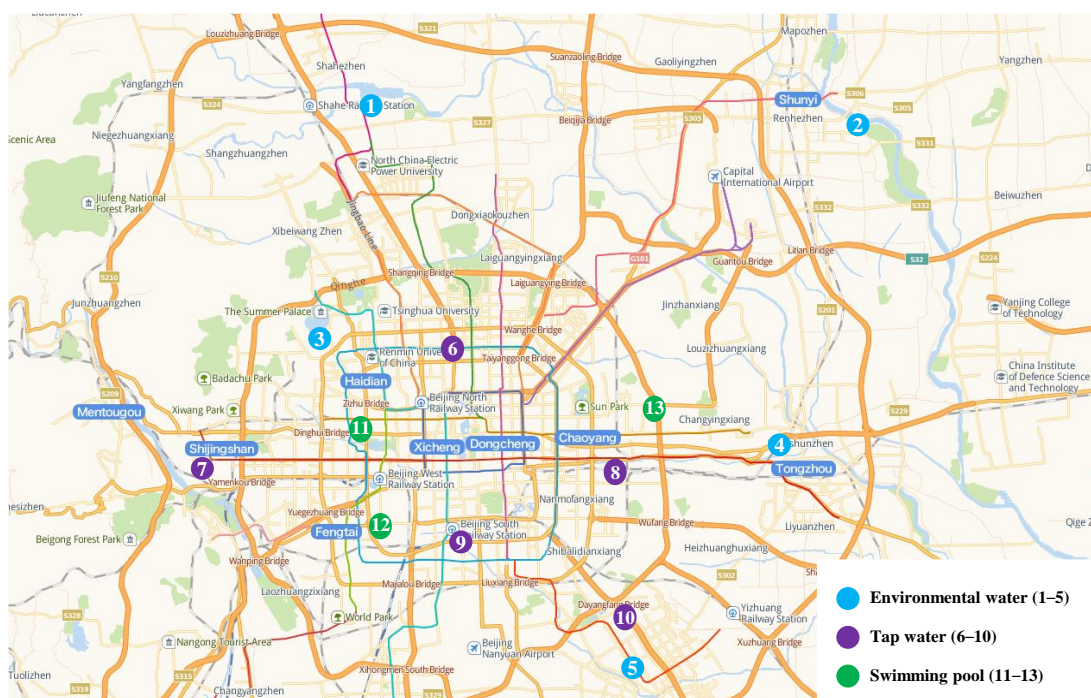

Figure S8. Geographical map of the sampling sites. GPS coordinates of the sampling sites are as follow:

- 1: Longitude 116.314474, Latitude 40.132104
- 2: Longitude 116.705309, Latitude 40.119746
- 3: Longitude 116.284614, Latitude 39.990074
- 4: Longitude 116.633157, Latitude 39.923817
- 5: Longitude 116.526654, Latitude 39.779353
- 6: Longitude 116.387956, Latitude 39.982224
- 7: Longitude 116.192053, Latitude 39.913136
- 8: Longitude 116.514437, Latitude 39.906274
- 9: Longitude 116.394567, Latitude 39.861759
- 10: Longitude 116.517599, Latitude 39.816773
- 11: Longitude 116.307467, Latitude 39.936597
- 12: Longitude 116.323278, Latitude 39.880587
- 13: Longitude 116.550944, Latitude 39.949431

## References

1. P. Zhu, X. Ling, W. Liu, L. Kong and Y. Yao, *Journal of chromatography. B, Analytical technologies in the biomedical and life sciences*, 2016, 1031, 61-67.
2. B. M. Barreca S., Vitelli M., Colzani L., Clerici L., Dellavedova P., *Journal of Chemistry*, 2018, 6, 9.
3. V. Mulabagal, L. Liu, J. Qi, C. Wilson and J. S. Hayworth, *Talanta*, 2018, 190, 95-102.
4. X. He, Y. He, S. Huang, Z. Fang, J. Liu, M. Ma and B. Chen, *Journal of chromatography. A*, 2019, 1601, 79-85.
5. S. Li, J. Ma, G. Wu, J. Li, A. Ostovan, Z. Song, X. Wang and L. Chen, *Journal of hazardous materials*, 2022, 429, 128333.
6. G. Li, Y. Lv, M. Chen, X. Ye, Z. Niu, H. Bai, H. Lei and Q. Ma, *Anal Chem*, 2021, 93, 1771-1778.
